# Supplementary material for: An Empirical Study on Cyber Crimes and Cybersecurity Awareness
Source: Research Square preprint supplement (doi:10.21203/rs.3.rs-3037289/v1), 2023-06-09
Supplement: Supplementary file 1 [file bb896aff0a076f31fead9e5a.xlsx]

## Sheet: Raw Data
ANSWER CHOICES	RESPONSES
Extremely aware	0.335
Very aware	0.399
Somewhat aware	0.2069
Not so aware	0.0739
Not at all aware	0.0099
Total Respondents: 203
ANSWER CHOICES	RESPONSES	Column1
Under 18	0.0099
18-24	0.399
25-34	0.4286
35-44	0.1034
45-54	0.0493
55-64	0.0099
65+	0
Total Respondents: 203
ANSWER CHOICES	RESPONSES	Column1
Much better	0.1457
Better	0.3719
Worse	0.3266
Much worse	0.0452
Other (please specify)	0.1106
TOTAL

## Sheet: Awarness & Age
Extremely aware	0.335	18-24	0.399
Very aware	0.399	25-34	0.4286
Not so aware	0.0739	45-54	0.0493
Not at all aware	0.0099	55-64	0.0099
		55-64	0.0099
		65+	0

## Sheet: Awarness & Impact
Much better	0.1457	Extremely aware	0.335
Better	0.3719	Very aware	0.399
Worse	0.3266	Not so aware	0.0739
Much worse	0.0452	Not at all aware	0.0099

## Sheet: Awarness
Extremely aware	0.335
Very aware	0.399
Somewhat aware	0.2069
Not so aware	0.0739
Not at all aware	0.0099

## Sheet: Age
Under 18	0.0099
18-24	0.399
25-34	0.4286
35-44	0.1034
45-54	0.0493
55-64	0.0099
65+	0

## Sheet: Impact
Much better	0.1457
Better	0.3719
Worse	0.3266
Much worse	0.0452
Other (please specify)	0.1106							0
									=

## Sheet: Table
	Awarness	Age	Impact
	Extremely aware	25-34	Much better	0.4286
	Very aware	18-24	Better	0.399
	Not so aware	55-64	Worse	0.0099
	Not at all aware	65+	Much worse	0
