# Supplementary material for: An Empirical Study on Cyber Crimes and Cybersecurity Awareness
Source: Research Square preprint supplement (doi:10.21203/rs.3.rs-3037289/v1), 2023-06-09
Supplement: Supplementary file 1 [file e21e8437ae5d75a3d3b4d7a7.docx]

| AGE GROUP  Answer Choices | AGE GROUP  Responses | AWARENESS  Answer Choices | AWARENESS  Responses |
| --- | --- | --- | --- |
| 18-24 | 39.90% | Extremely aware | 33.50% |
| 25-34 | 42.86% | Very aware | 39.90% |
| 35-44 | 10.34% | Somewhat aware | 20.69% |
| 45-54 | 4.93% | Not so aware | 7.39% |
| 55-64 | 0.99% | Not at all aware | 0.99% |
|  |  |  |  |

| AWARENESS  Answer Choices | AWARENESS  Responses | IMPACT LEVEL  Answer Choices | IMPACT LEVEL  Responses |
| --- | --- | --- | --- |
| Extremely aware | 33.50% | Much better | 14.57% |
| Very aware | 39.90% | Better | 37.19% |
| Somewhat aware | 20.69% | Worse | 32.66% |
| Not so aware | 7.39% | Much worse | 4.52% |
| Not at all aware | 0.99% | Other | 11.06% |

**Table 1: Values of Collected Responses**
